# Supplementary material for: Self-Templating Synthesis of N/P/Fe Co-Doped 3D Porous Carbon for Oxygen Reduction Reaction Electrocatalysts in Alkaline Media
Source: MDPI journal article supplement (doi:10.3390/nano12122106), 2022-06-19
Supplement: s1 [file s1]

## Supplementary Materials

# Self-Templating Synthesis of N/P/Fe co-Doped 3D Porous Carbon for Oxygen Reduction Reaction Electrocatalysts in Alkaline Media

Yan Rong <sup>\*,1</sup> and Siping Huang <sup>2</sup>

<sup>1</sup> College of Resources & Environment and Historical Culture, Xianyang Normal University, 43 Wenlin Road, Weicheng District, Xianyang 712000, China; allenry@126.com

<sup>2</sup> College of Chemistry and Chemical Engineering, Xianyang Normal University, 43 Wenlin Road, Weicheng District, Xianyang 712000, China; huangsiping1971@163.com

\* Correspondence: allenry@126.com

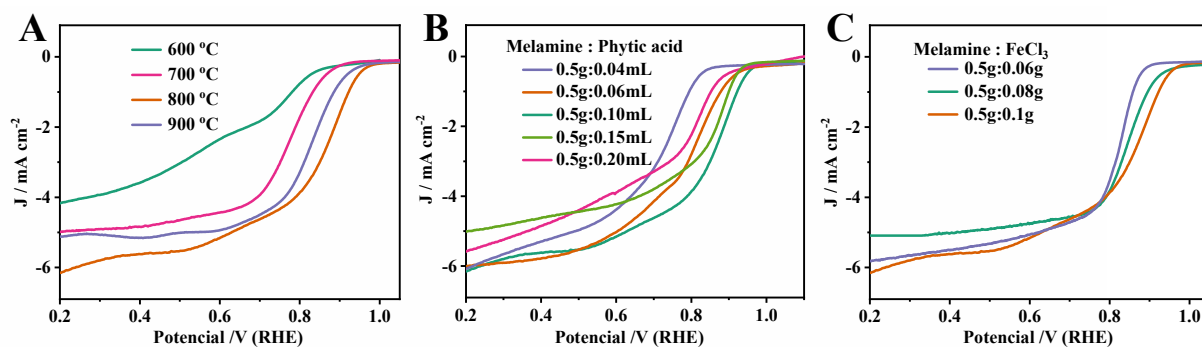

**Figure S1** ORR LSV curves of A series of N/Fe-Cs samples with (A) different annealing temperature; (B) different ratio of melamine to phytic acid and (C) different ratio of melamine to  $\text{FeCl}_3$ .

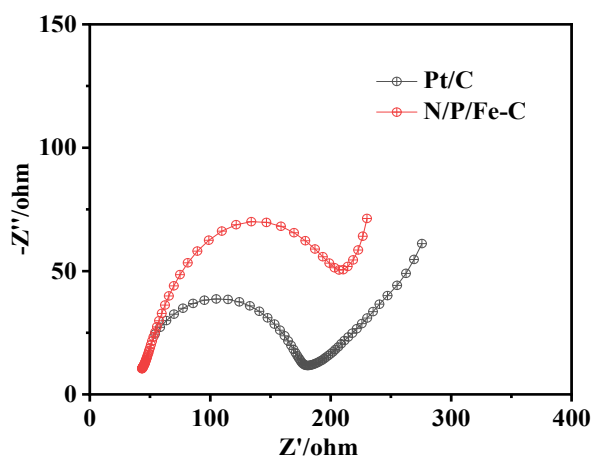

**Figure S2.** EIS curves of the N/P/Fe-C and Pt/C in 0.1 M KOH electrolyte. Potential: at open circuit potential from 0.01 to 100,000 Hz with a modulation amplitude: 10 mV.
